# Supplementary material
Source: ML conference proceedings conference paper supplement (https://aclanthology.org/2020.wnut-1.25)
Supplement: OptionalSupplementaryMaterial [file 2020.wnut-1.25.OptionalSupplementaryMaterial.zip]

Archive with 1 entries (1 files):
- WNUT2020 - Fantastic Features - Camera Ready-Appendix.pdf
